# Supplementary material
Source: Springer Nature journal article supplement (https://www.springermedizin.de/resource/supplementary/13006_2005_3_MOESM1_ESM.pdf/9627816)

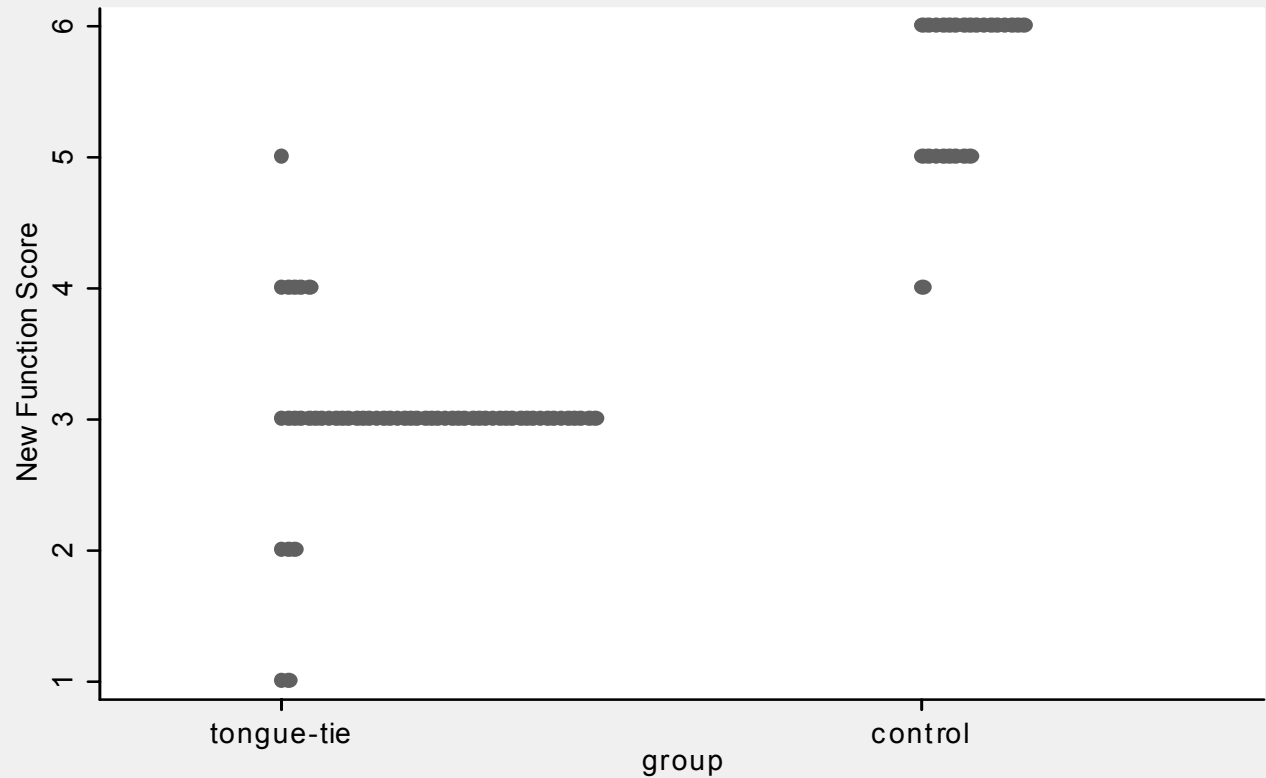

Supplement: MOESM1 [file 9627816]
